# Supplementary material
Source: PubMed Central journal article supplement (PMC5953781)
Supplement: NIHMS941159-supplement-Supplemental_Data_File___doc___tif__pdf__etc__.pdf [file NIHMS941159-supplement-Supplemental_Data_File___doc___tif__pdf__etc__.pdf]

**APPENDIX Table. Scenarios and Checklist Scoring Rubric.**

**Form A Scenarios**

**Form B Scenarios**

|                                                                                                                                                                                                                                                                                                                                                                                                                                                                                                                                                                                                                                                                                                                                                                                                                    |                                                                                                                                                                                                                                                                                                                                                                                                                                                                                                                                                                                                                                                                                                                                                                                             |
|--------------------------------------------------------------------------------------------------------------------------------------------------------------------------------------------------------------------------------------------------------------------------------------------------------------------------------------------------------------------------------------------------------------------------------------------------------------------------------------------------------------------------------------------------------------------------------------------------------------------------------------------------------------------------------------------------------------------------------------------------------------------------------------------------------------------|---------------------------------------------------------------------------------------------------------------------------------------------------------------------------------------------------------------------------------------------------------------------------------------------------------------------------------------------------------------------------------------------------------------------------------------------------------------------------------------------------------------------------------------------------------------------------------------------------------------------------------------------------------------------------------------------------------------------------------------------------------------------------------------------|
| <p><b>1. 3<sup>rd</sup> Degree Heart Block</b></p> <ul style="list-style-type: none"> <li><input type="checkbox"/> Establishes patient is somnolent, but arousable</li> <li><input type="checkbox"/> Recognizes complete heart block on monitor</li> <li><input type="checkbox"/> Orders 12-lead EKG</li> <li><input type="checkbox"/> Stops Amiodarone</li> <li><input type="checkbox"/> Administers Atropine</li> <li><input type="checkbox"/> Administers appropriate vasoactive agent for hypotension</li> <li><input type="checkbox"/> Applies Pacing Pads</li> <li><input type="checkbox"/> Defines Pacing Parameters</li> <li><input type="checkbox"/> Begins Pacing</li> </ul>                                                                                                                             | <p><b>1. Atrial Fibrillation</b></p> <ul style="list-style-type: none"> <li><input type="checkbox"/> Increase FIO<sub>2</sub></li> <li><input type="checkbox"/> Order 12 lead EKG</li> <li><input type="checkbox"/> Diagnoses atrial fibrillation</li> <li><input type="checkbox"/> Orders appropriate pharmacologic treatment</li> <li><input type="checkbox"/> Recognizes that condition continues to deteriorate</li> <li><input type="checkbox"/> Determines urgent need for cardioversion</li> <li><input type="checkbox"/> Selects appropriate settings and delivery for cardioversion</li> <li><input type="checkbox"/> Recognizes failure of cardioversion on 1<sup>st</sup> attempt</li> <li><input type="checkbox"/> Second cardioversion attempted with higher energy</li> </ul> |
| <p><b>2. ARDS</b></p> <ul style="list-style-type: none"> <li><input type="checkbox"/> Interprets new blood gas result</li> <li><input type="checkbox"/> Requests/Reviews Ventilator Settings</li> <li><input type="checkbox"/> Auscultation of Chest</li> <li><input type="checkbox"/> Requests CXR</li> <li><input type="checkbox"/> Interprets CXR as worsening of ARDS</li> <li><input type="checkbox"/> Adds PEEP to at least 10 cm</li> <li><input type="checkbox"/> Reduces Tidal Volume, mentions 6 ml/kg of ideal body weight</li> <li><input type="checkbox"/> Discuss lung protective ventilation/ventilation goals with nurse</li> <li><input type="checkbox"/> Orders repeat ABG</li> </ul>                                                                                                            | <p><b>2. Pulmonary Embolus</b></p> <ul style="list-style-type: none"> <li><input type="checkbox"/> Administers fluid challenge</li> <li><input type="checkbox"/> Auscultates chest</li> <li><input type="checkbox"/> Orders chest X-ray</li> <li><input type="checkbox"/> Interprets chest X-ray</li> <li><input type="checkbox"/> Orders &amp; interprets EKG</li> <li><input type="checkbox"/> Requests ABG</li> <li><input type="checkbox"/> Correctly interprets ABG</li> <li><input type="checkbox"/> Suggests pulmonary embolus diagnosis</li> <li><input type="checkbox"/> Seeks confirmatory evidence of PE</li> <li><input type="checkbox"/> Discusses anticoagulation therapy with surgery service</li> </ul>                                                                     |
| <p><b>3. Status Asthmatics</b></p> <ul style="list-style-type: none"> <li><input type="checkbox"/> Change Nasal to 100% O<sub>2</sub></li> <li><input type="checkbox"/> Auscultates chest and determines presence of wheezing. (Must auscultate bilaterally)</li> <li><input type="checkbox"/> Talks to patient about breathing and notes unable to complete sentences</li> <li><input type="checkbox"/> Begins aggressive B-agonist therapy- only gets credit if ordered immediately after auscultation</li> <li><input type="checkbox"/> Confirms history of severe asthma</li> <li><input type="checkbox"/> Confirms asthma requiring ICU admission in the past</li> <li><input type="checkbox"/> Orders an intravenous steroid</li> <li><input type="checkbox"/> Orders an inhaled anti-cholinergic</li> </ul> | <p><b>3. Postoperative Atelectasis</b></p> <ul style="list-style-type: none"> <li><input type="checkbox"/> Change Nasal Cannula to 100% O<sub>2</sub></li> <li><input type="checkbox"/> Auscultate to determine absence of wheezing</li> <li><input type="checkbox"/> Discusses breathing with patient</li> <li><input type="checkbox"/> Chest X-Ray ordered</li> <li><input type="checkbox"/> Chest X-Ray interpreted</li> <li><input type="checkbox"/> Incentive Spirometry ordered</li> <li><input type="checkbox"/> Pain Relief Assessment</li> <li><input type="checkbox"/> Suggest PCA or other appropriate pain therapy to improve pain relief</li> </ul>                                                                                                                            |

|                                                                                                                                                                                                                                                                                                                                                                                                                                                                                                                                                                                                                                                                                                                                                                                                                                                |                                                                                                                                                                                                                                                                                                                                                                                                                                                                                                                                                                                                                                                                                                                                                                                                                                                                                                                                                     |
|------------------------------------------------------------------------------------------------------------------------------------------------------------------------------------------------------------------------------------------------------------------------------------------------------------------------------------------------------------------------------------------------------------------------------------------------------------------------------------------------------------------------------------------------------------------------------------------------------------------------------------------------------------------------------------------------------------------------------------------------------------------------------------------------------------------------------------------------|-----------------------------------------------------------------------------------------------------------------------------------------------------------------------------------------------------------------------------------------------------------------------------------------------------------------------------------------------------------------------------------------------------------------------------------------------------------------------------------------------------------------------------------------------------------------------------------------------------------------------------------------------------------------------------------------------------------------------------------------------------------------------------------------------------------------------------------------------------------------------------------------------------------------------------------------------------|
| <p><b>4. Decreased Urine Output-Obstructed Foley</b></p> <ul style="list-style-type: none"> <li><input type="checkbox"/> Inquiries about urine output</li> <li><input type="checkbox"/> Inquiries about IV fluid rate</li> <li><input type="checkbox"/> Requests information about HR and blood pressure</li> <li><input type="checkbox"/> Inquiries about patient symptoms</li> <li><input type="checkbox"/> Examines abdomen (attention to lower abdomen)</li> <li><input type="checkbox"/> Examines foley catheter</li> <li><input type="checkbox"/> Requests irrigation of foley catheter</li> <li><input type="checkbox"/> Orders bladder ultrasound</li> <li><input type="checkbox"/> Orders foley catheter replaced</li> </ul>                                                                                                          | <p><b>4. Decreased Urine Output-Hypovolemia</b></p> <ul style="list-style-type: none"> <li><input type="checkbox"/> Confirms that urine output decrease previously treated with 500 ml bolus 3 hours ago</li> <li><input type="checkbox"/> Notes current fluid management at 75 ml/hr</li> <li><input type="checkbox"/> Notes changes in CVP, BP and HR</li> <li><input type="checkbox"/> Increases maintenance fluids, recognizes hypovolemia needing fluid resuscitation</li> <li><input type="checkbox"/> Notes available labs: Hb 9.6, WBC 12, Creat 0.8, BUN 42, Lactate 3.2</li> <li><input type="checkbox"/> Orders repeat lab tests: CBC, lactate, BMP</li> <li><input type="checkbox"/> Administers fluid challenge with increase in BP to 85/50</li> <li><input type="checkbox"/> Orders further fluid bolus</li> </ul>                                                                                                                   |
| <p><b>5. Cardiogenic Shock</b></p> <ul style="list-style-type: none"> <li><input type="checkbox"/> Administers 100 % O<sub>2</sub></li> <li><input type="checkbox"/> Recognizes presence of ST-T Wave changes on monitor</li> <li><input type="checkbox"/> Orders 12-lead EKG</li> <li><input type="checkbox"/> Performs physical examination</li> <li><input type="checkbox"/> Sends appropriate lab tests: Troponin, CK-MB, CBC, ABG, BNP</li> <li><input type="checkbox"/> Begins vasopressor therapy to improve blood pressure</li> <li><input type="checkbox"/> Orders or completes stat TTE</li> <li><input type="checkbox"/> Initiates cardiology consult with understanding pt may need to go to the cath lab</li> <li><input type="checkbox"/> Inquiries about I/O</li> <li><input type="checkbox"/> Orders rectal aspirin</li> </ul> | <p><b>5. Septic Shock</b></p> <ul style="list-style-type: none"> <li><input type="checkbox"/> Increase FiO<sub>2</sub></li> <li><input type="checkbox"/> Notes patient is febrile, tachycardic, hypotensive, tachypneic (needs all 4)</li> <li><input type="checkbox"/> Reviews fluid therapy (4 liters over 12 hours) &amp; orders fluid bolus</li> <li><input type="checkbox"/> Reviews lab tests: Hgb 10.2, WBC 18.2 with left shift, Lactate 3.9</li> <li><input type="checkbox"/> Performs physical examination</li> <li><input type="checkbox"/> Articulates goals of therapy (MAP, CVP, SVO<sub>2</sub> and UO) (goal is CVP is 12-14)</li> <li><input type="checkbox"/> Begins vasopressor therapy to improve blood pressure</li> <li><input type="checkbox"/> Indicates desire to place central line</li> <li><input type="checkbox"/> Obtains blood cultures</li> <li><input type="checkbox"/> Initiates antimicrobial therapy</li> </ul> |
| <p><b>6. Cuff Leak</b></p> <ul style="list-style-type: none"> <li><input type="checkbox"/> Orders/administers 100% FiO<sub>2</sub></li> <li><input type="checkbox"/> Begins manual ventilation via ambu bag to auscultate chest</li> <li><input type="checkbox"/> Notes ET tube pilot balloon is deflated and re-inflates pilot balloon</li> <li><input type="checkbox"/> Diagnoses cuff leak</li> <li><input type="checkbox"/> Establishes history of difficult intubation based on history and intubation note(s)</li> <li><input type="checkbox"/> Requests help for airway</li> <li><input type="checkbox"/> Requests bronchoscope</li> <li><input type="checkbox"/> Requests difficult airway equipment</li> </ul>                                                                                                                        | <p><b>6. Mucus Plug</b></p> <ul style="list-style-type: none"> <li><input type="checkbox"/> Orders/administers 100% FiO<sub>2</sub></li> <li><input type="checkbox"/> Begins manual ventilation via ambu bag</li> <li><input type="checkbox"/> Auscultates chest</li> <li><input type="checkbox"/> Determines decreased breath sounds</li> <li><input type="checkbox"/> Passes suction catheter (stops at 20 cm)</li> <li><input type="checkbox"/> Inquires/reviews airway history</li> <li><input type="checkbox"/> Calls for help</li> <li><input type="checkbox"/> Requests bronchoscope</li> <li><input type="checkbox"/> Requests difficult airway equipment</li> </ul>                                                                                                                                                                                                                                                                        |

|                                                                                                                                                                                                                                                                                                                                                                                                                                                                                                                                                                                                                                                                                                                                                                        |                                                                                                                                                                                                                                                                                                                                                                                                                                                                                                                                                                                                                                                                                                                                                                                                          |
|------------------------------------------------------------------------------------------------------------------------------------------------------------------------------------------------------------------------------------------------------------------------------------------------------------------------------------------------------------------------------------------------------------------------------------------------------------------------------------------------------------------------------------------------------------------------------------------------------------------------------------------------------------------------------------------------------------------------------------------------------------------------|----------------------------------------------------------------------------------------------------------------------------------------------------------------------------------------------------------------------------------------------------------------------------------------------------------------------------------------------------------------------------------------------------------------------------------------------------------------------------------------------------------------------------------------------------------------------------------------------------------------------------------------------------------------------------------------------------------------------------------------------------------------------------------------------------------|
| <p><b>7. Hyperkalemia</b></p> <ul style="list-style-type: none"> <li><input type="checkbox"/> Examines the patient, focus on injured leg. Notes pulses are present and confirms adequate perfusion</li> <li><input type="checkbox"/> Reviews previous K+</li> <li><input type="checkbox"/> Orders new set of electrolytes</li> <li><input type="checkbox"/> Reviews vitals I/O's: finds progressive tachycardia, UOP had been 30ml/hr then decreased</li> <li><input type="checkbox"/> Notes peaked T-waves on monitor</li> <li><input type="checkbox"/> Requests 12-lead EKG</li> <li><input type="checkbox"/> 1amp Calcium Gluconate</li> <li><input type="checkbox"/> 10U IV insulin with 1amp D50</li> <li><input type="checkbox"/> Increases IV Fluids</li> </ul> | <p><b>7. Hyperkalemia-Pulseless Leg</b></p> <ul style="list-style-type: none"> <li><input type="checkbox"/> Examines the patient, focus on injured leg. Notes pulses are absent</li> <li><input type="checkbox"/> Contacts vascular surgery service</li> <li><input type="checkbox"/> Reviews I/O's</li> <li><input type="checkbox"/> Notes peaked T-waves on monitor</li> <li><input type="checkbox"/> Measures compartment pressure</li> <li><input type="checkbox"/> Requests 12-lead EKG</li> <li><input type="checkbox"/> Recognizes hyperkalemia as acute problem and provides differential</li> <li><input type="checkbox"/> Orders 1amp Calcium Gluconate</li> <li><input type="checkbox"/> Orders 10U IV insulin with 1amp D50</li> <li><input type="checkbox"/> Increases IV Fluids</li> </ul> |
| <p><b>8. Opioid Overdose</b></p> <ul style="list-style-type: none"> <li><input type="checkbox"/> Increases FiO2</li> <li><input type="checkbox"/> Determines responsiveness</li> <li><input type="checkbox"/> Determines opioid use in post-anesthesia care unit</li> <li><input type="checkbox"/> Assess respiratory rate</li> <li><input type="checkbox"/> Auscultates chest</li> <li><input type="checkbox"/> Assess pupils</li> <li><input type="checkbox"/> Requests opioid antagonist</li> <li><input type="checkbox"/> Administers appropriate dose of opioid antagonist</li> <li><input type="checkbox"/> Discusses management post-opioid antagonist</li> </ul>                                                                                               | <p><b>8. Ischemic Stroke</b></p> <ul style="list-style-type: none"> <li><input type="checkbox"/> Establishes disorientation to place, person and time</li> <li><input type="checkbox"/> Evaluates for lateralizing signs</li> <li><input type="checkbox"/> Calls for stroke team (neurology consult)</li> <li><input type="checkbox"/> Orders stat head CT scan</li> <li><input type="checkbox"/> Recognize risk factors for stroke in patient</li> <li><input type="checkbox"/> Orders stroke work up: TTE, carotid dopplers</li> </ul>                                                                                                                                                                                                                                                                 |
